# Supplementary material for: Enhanced encapsulation of superparamagnetic Fe3O4 in acidic core-containing micelles for magnetic resonance imaging
Source: Royal Society of Chemistry journal article supplement (doi:10.1039/c5ra24582f), 2015-01-01

## SUPPORTING INFORMATION

### Enhanced encapsulation of superparamagnetic Fe<sub>3</sub>O<sub>4</sub> in acidic core-containing micelles for magnetic resonance imaging

Depannita Biswas,<sup>#</sup> Puzhen Li,<sup>#</sup> Dapeng Liu,<sup>§</sup> Jung Kwon Oh<sup>#\*</sup>

<sup>#</sup> Department of Chemistry and Biochemistry, Centre for NanoScience Research, Concordia University, Montreal, Quebec, Canada H4B 1R6

<sup>§</sup> Department of Chemistry and Waterloo Institute for Nanotechnology, University of Waterloo, Waterloo, ON, Canada N2L 3G1.

**Figure S1.** GPC trace of PEG-b-PtBMA (BCP-HY-0), compared with PEG-Br.

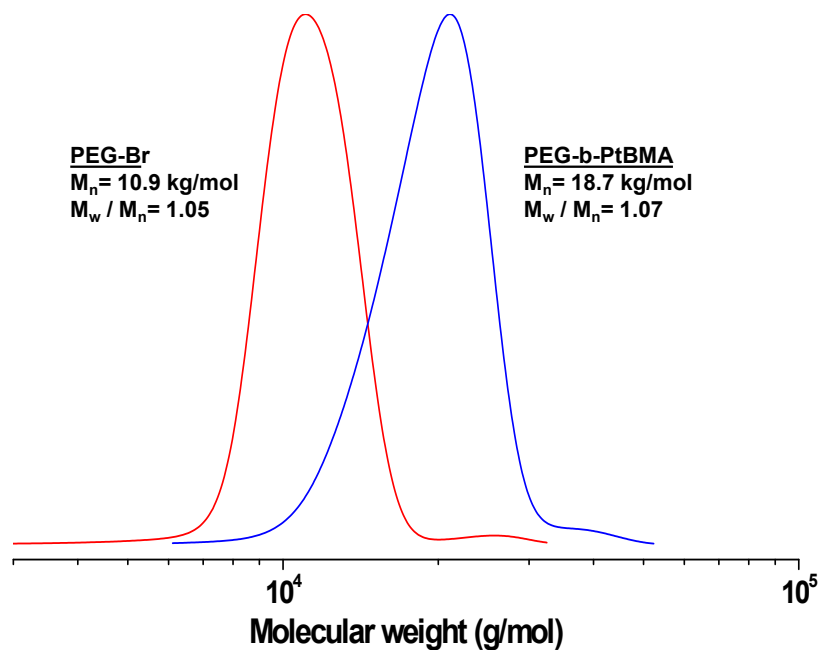

**Figure S2.** Extent of hydrolytic cleavage of pendant PtBMA in PEG-b-PtBMA vs amount of  $\text{CF}_3\text{COOH}$  as  $[\text{CF}_3\text{COOH}]_0/[\text{tBMA}]_0$ .

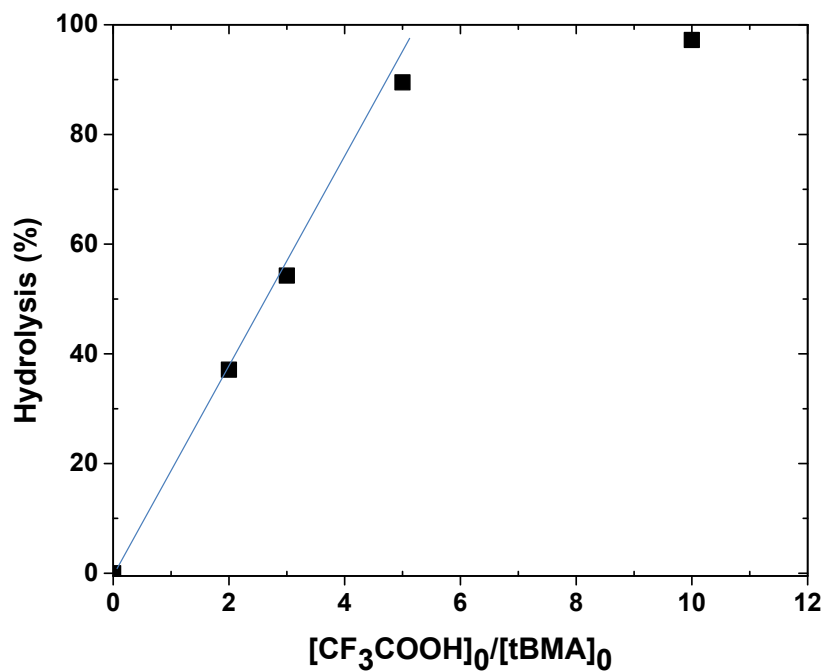

**Figure S3.** Fluorescence spectra to determine CMC. Arrows indicate the maximum fluorescence wavelength.

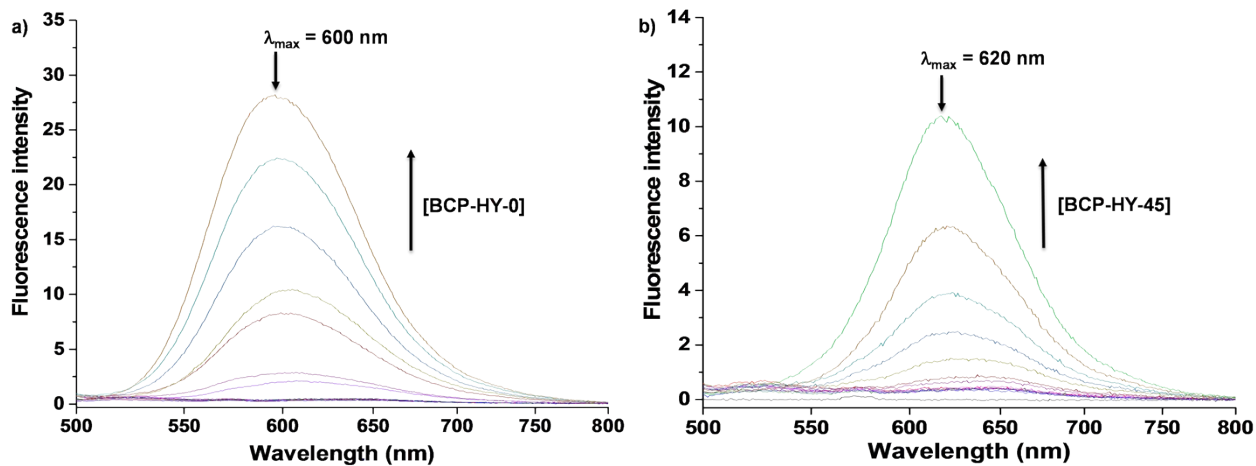

**Figure S4.** DLS histograms of SNP/BCP-HY-0 micelles prepared with initial wt ratio of SNP/BCP-HY-0 = 1/1 in feed, before and after centrifugation.

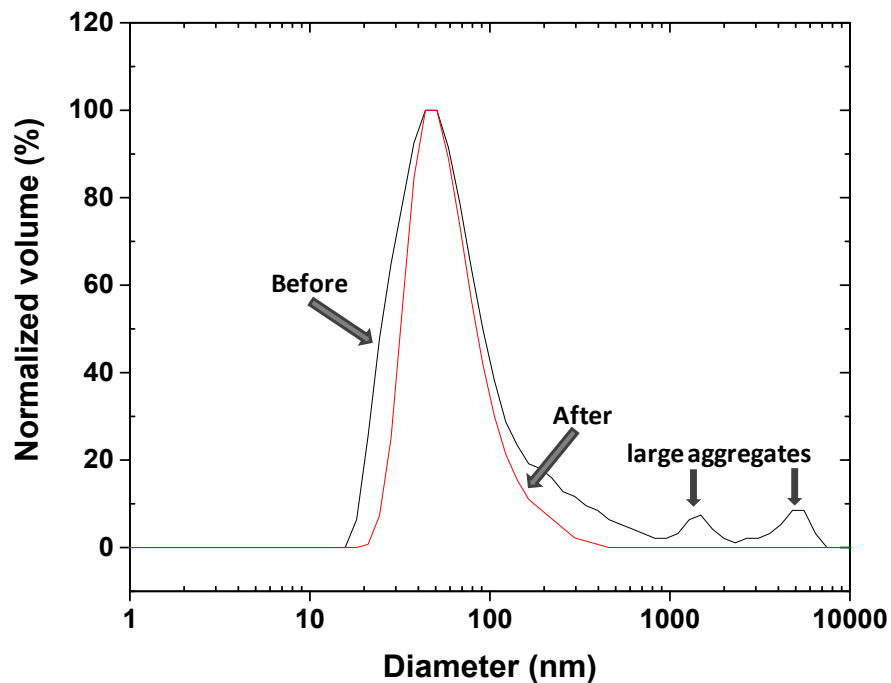

**Figure S5.** DLS diagrams of SNP/BCP-HY-0 micelles in aqueous solution (a) and TGA traces of purified, lyophilized SNP/BCP-HY-0 micelles compared with OA-SNPs and BCP-HY-0 (b).

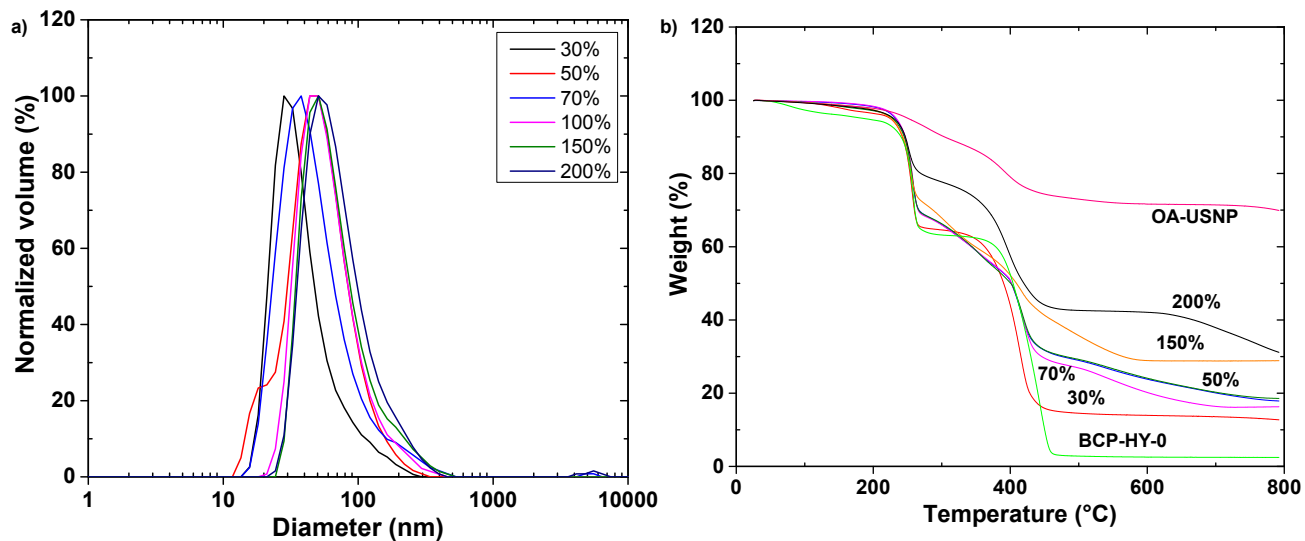

**Figure S6.** Relaxation rates ( $1/T_1$  and  $1/T_2$ ) versus Fe concentration for SNP/BCP-HY-0 micelles prepared in the presence of different amounts of SNPs in feed as the wt ratio of SNPs/BCP-HY-0 = 0.5/1 (a), 1/1 (b), and 1.5/1 (c).

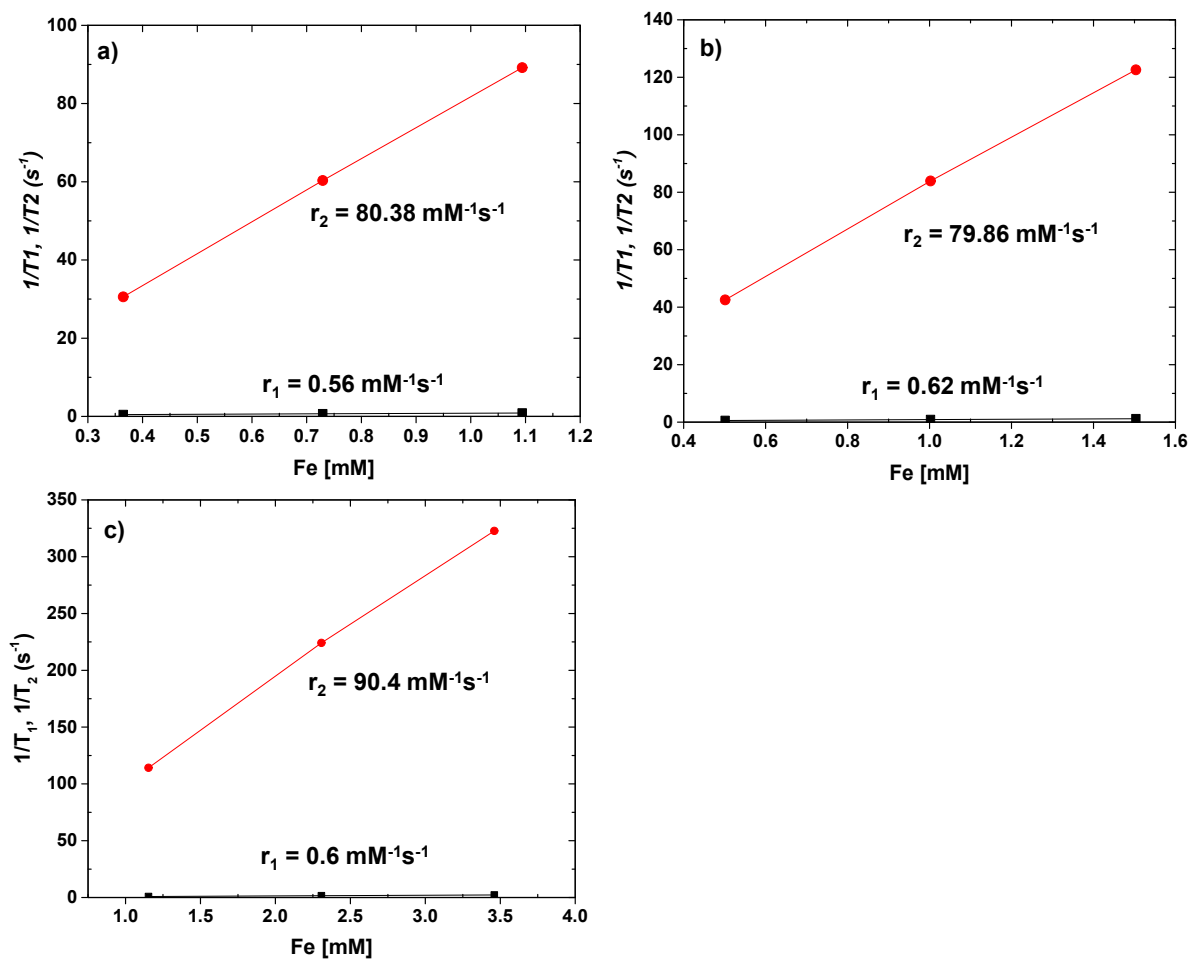

**Figure S7.** DLS diagrams of SNP/BCP-HY-45 micelles after 48 hrs of incubation with BSA at different mass ratios of BSA/micelles = 40/1 and 1/1.

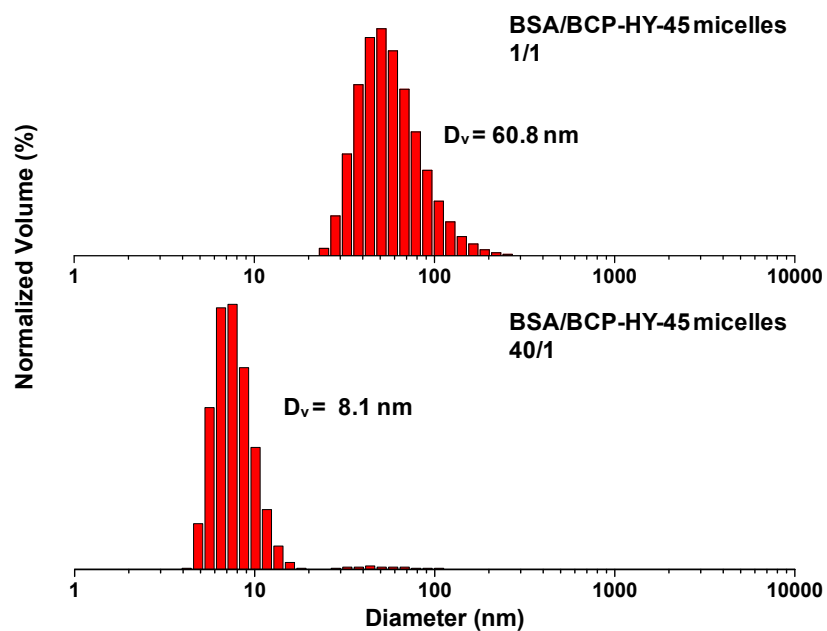

**Figure S8.** UV/Vis spectrum of Dox-loaded micelles in a mixture of DMF/water = 5/1 v/v.

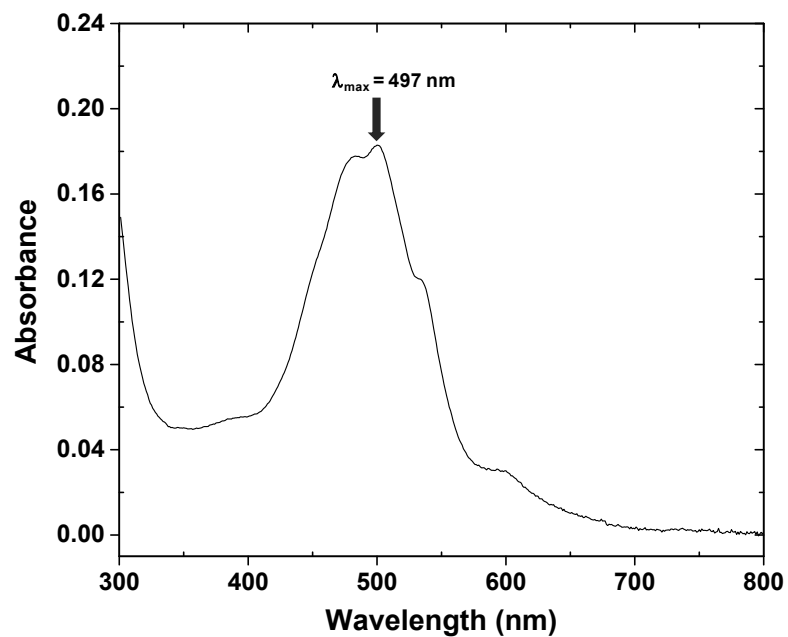

**Figure S9.** Overlaid fluorescence spectra of outer water for Dox-loaded BCP-HY-45 micelles at pH = 7 (a) and pH = 5 (b) over time.

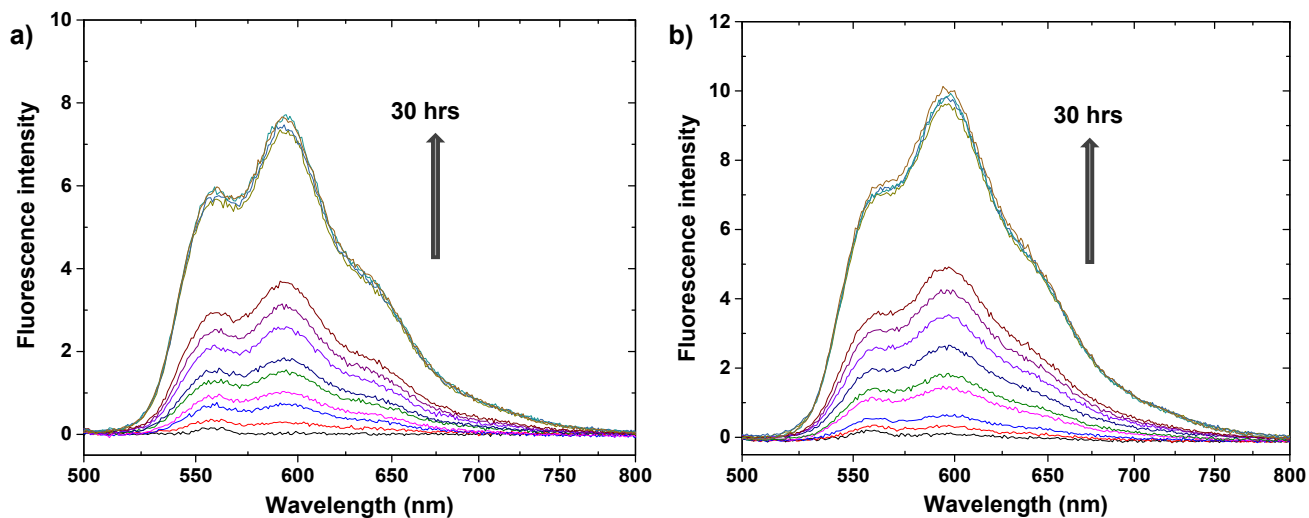

**Figure S10.** DLS diagrams of empty micelles of BCP-HY-45 at pH = 5.

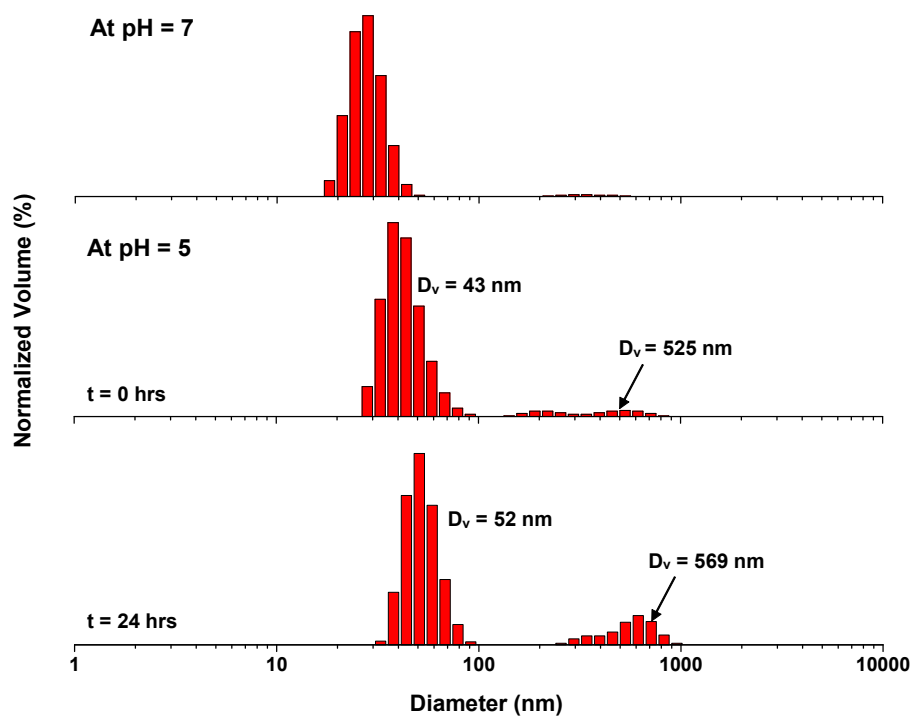

Supplement: c5ra24582f1.pdf [file c5ra24582f1.pdf]
